# Supplementary material for: Machine Learning Model for Predicting Outcomes of Biologic Therapy in Psoriasis
Source: bioRxiv or medRxiv preprint supplement (doi:10.1101/2021.12.05.21267219), 2021-12-07
Supplement: Supplementary file [file media-1.pdf]

**Table S1.** Multivariate Cox proportional hazards analysis output.

| Covariates                 | Coefficient | P-value   | HR        | 95% CI    |           |
|----------------------------|-------------|-----------|-----------|-----------|-----------|
|                            |             |           |           | Lower     | Upper     |
| Biologic                   |             |           |           |           |           |
| Adalimumab                 | Reference   | Reference | Reference | Reference | Reference |
| Etanercept                 | 0.461       | < 0.001   | 1.586     | 1.341     | 1.876     |
| Guselkumab                 | -0.801      | 0.053     | 0.449     | 0.199     | 1.011     |
| Infliximab                 | 0.278       | 0.011     | 1.321     | 1.065     | 1.638     |
| Ixekizumab                 | -0.493      | 0.035     | 0.634     | 0.387     | 0.965     |
| Secukinumab                | -0.094      | 0.372     | 0.911     | 0.741     | 1.118     |
| Ustekinumab                | -0.493      | < 0.001   | 0.611     | 0.520     | 0.719     |
| Age                        | 0.002       | 0.630     | 1.002     | 0.995     | 1.010     |
| Age at Psoriasis Diagnosis | -0.001      | 0.814     | 0.999     | 0.995     | 1.004     |
| Age at First Biologic      | -0.002      | 0.607     | 0.998     | 0.992     | 1.005     |
| Bio-Naïve                  | -0.328      | < 0.001   | 0.721     | 0.637     | 0.816     |
| Sex (Male)                 | -0.262      | < 0.001   | 0.769     | 0.680     | 0.870     |
| Weight (kg)                | 0.002       | 0.015     | 1.002     | 1.000     | 1.003     |
| Concomitant PsA            | 0.064       | 0.301     | 1.066     | 0.944     | 1.205     |
| Comorbidities              | -0.037      | 0.734     | 1.038     | 0.777     | 1.195     |
| Concomitant MTX            | 0.128       | 0.263     | 1.136     | 0.909     | 1.421     |
| Baseline PASI              | 0.010       | 0.025     | 1.010     | 1.001     | 1.019     |
| Baseline DLQI              | 0.007       | 0.134     | 1.007     | 0.998     | 1.016     |

HR, hazard ratio; CI, confidence interval; PsA, psoriatic arthritis; MTX, methotrexate; PASI, Psoriasis Area and Severity Index; DLQI, Dermatology Life Quality Index

**Table S2.** Detailed results for gradient boosted trees.

| Criterion            | Value | Standard Deviation |
|----------------------|-------|--------------------|
| Accuracy             | 77.5% | ±1.0%              |
| Classification Error | 22.5% | ±1.0%              |
| AUC                  | 85.1% | ±0.6%              |
| Precision            | 84.5% | ±1.3%              |
| Recall               | 80.7% | ±2.4%              |
| F Measure            | 82.5% | ±1.1%              |
| Sensitivity          | 80.7% | ±2.4%              |
| Specificity          | 71.5% | ±1.8%              |

**Table S3.** Confusion matrix for gradient boosted trees.

|                      | True 'continue' | True 'stopped' | Class 'precision' |
|----------------------|-----------------|----------------|-------------------|
| Predicted 'continue' | 582             | 302            | 65.84%            |
| Predicted 'stopped'  | 232             | 1262           | 84.47%            |
| Class 'recall'       | 71.50%          | 80.69%         | -----             |
